# Supplementary material
Source: publisher site journal article supplement (https://www.dovepress.com/article/494310)
Supplement: Supplementary file 1 [file get_supplementary_file.php]

Supplementary Material

# Supplementary Data

**Supplementary Table 1**. Clinical characteristics of patients with *M. gordonae* infection.

| **ID** | **Gender** | **Age** | **Underlying diseases a** | **Symptoms b** | | | | | | **Imaging findings** | **Identification methods c** | | | **Treatment Options** | **Final treatment duration d** | **Prognosis** | **Reference** |
| --- | --- | --- | --- | --- | --- | --- | --- | --- | --- | --- | --- | --- | --- | --- | --- | --- | --- |
| **Cough** | **Fever** | **Weight loss** | **Night sweats** | **Hemoptysis** | **Dyspnea** | **16S rDNA** | **Culture** | **Acid-fast bacilli** |
| 1 | Male | 50 | Previous pulmonary tuberculosis, left upper lung lobectomy | 1 | 0 | 1 | 1 | 1 | 0 | cavitation and pericavitary and dense apical infiltrates in the left upper lung |  | sputum positive |  | Rifampin and Ethambutol | 22 months | Recovered | 1 |
| 2 | Male | 41 | esophageal candidiasis | 0 | 1 | 0 | 0 | 0 | 0 | No |  | sputum and bone marrow positive |  | Isoniazid, ethambutol, anisomycin, streptomycin, and clofazimine | / | Died | 2 |
| 3 | Male | 73 | Chronic bronchitis and old pulmonary tuberculosis | 1 | 0 | 1 | 0 | 1 | 0 | An irregular cavitating mass in the right upper lobe with apical pleural thickening and a well circumscribed mass in the right lower lobe |  | sputum positive |  | Rifampin, Isoniazid and Ethambutol | / | Died | 3 |
| 4 | Male | 76 | Anorexia | 0 | 0 | 1 | 0 | 0 | 0 | extensive shadowing in the right upper zone |  | sputum positive |  | Rifampin, Isoniazid | 18 months | Recovered | 4 |
| 5 | Male | 60 | Previous pulmonary tuberculosis | 1 | 0 | 1 | 0 | 0 | 0 | large cavities at the apices of both lungs with widespread patchy consolidation bilaterally |  | sputum positive |  | Rifampin, Isoniazid | 9 months | Recovered | 4 |
| 6 | Male | 56 | No | 1 | 0 | 1 | 0 | 0 | 1 | Infiltrate with cavitary lesions in the left upper lobe |  | sputum positive | sputum positive | Isoniazid, Ethambutol, streptomycin, and rifampin | / | Died | 5 |
| 7 | Male | 70 | Hodgkin's disease | 1 | 1 | 0 | 0 | 0 | 1 | consolidation of the right upper lobe and fibrous tracts in the left lung |  | lung tissue positive |  | open lung biopsy | / | Died | 6 |
| 8 | Female | 40 | Previous pulmonary tuberculosis | 1 | 1 | 1 | 0 | 0 | 0 | Consolidation in the fight lower lobe |  | sputum positive |  | Isoniazid, Rifampin, Ethambutol and Streptomycin | 12 months | Recovered | 7 |
| 9 | Male | 46 | Previous pulmonary tuberculosis | 0 | 0 | 1 | 1 | 0 | 0 | Right lower lobe infiltrate, hilar nodes |  | sputum positive |  | Rifampin, Ethambutol, Streptomycin | 12 months | Recovered | 8 |
| 10 | Female | 28 | No | 0 | 1 | 1 | 1 | 0 | 0 | Right lower lobe infiltrate |  | sputum positive | sputum positive | Isoniazid, Rifampin, Ethambutol, Pyrazinamide | / | Recovered | 8 |
| 11 | Male | 37 | Previous pulmonary tuberculosis | 0 | 1 | 0 | 1 | 0 | 0 | Right lower lobe infiltrate; hilar, mediastinal adenopathy |  | sputum positive | sputum positive | Isoniazid, Rifampin, Pyrazinamide | 12 months | Recovered | 8 |
| 12 | Female | 36 | Previous pulmonary tuberculosis | 0 | 1 | 0 | 1 | 0 | 0 | Normal on admission, miliary pattern in 2 weeks |  | sputum positive |  | Isoniazid, Rifampin, Ethambutol | / | Died | 8 |
| 13 | Male | 27 | No | 0 | 1 | 0 | 0 | 0 | 0 | Left lower lobe atelectasis |  | sputum positive | sputum positive | None | / | Unknown | 8 |
| 14 | Female | 11 | renal cell carcinoma | 1 | 1 | 1 | 0 | 0 | 0 | Mild pretracheal lymphadenopathy and radiodensities scattered through both lung fields and wedge-shaped densities at the periphery of the middle right and left lung |  | sputum and bone marrow positive |  | Isoniazid, Rifampin, Pyrazinamide, amikacin, ethambutol, and ciprofloxacin | 3 months | Recovered | 9 |
| 15 | Male | 53 | COPD | 1 | 0 | 1 | 0 | 0 | 1 | infiltrate with cavitary lesions in the left upper lobe |  | sputum positive | sputum positive | Isoniazid, Ethambutol, Inamide, cycloserine, rifabutin | 24 months | Recovered | 10 |
| 16 | Male | 17 | None | 1 | 0 | 0 | 0 | 1 | 0 | Two nodules and ground glass ln the lower lobe of the left lung |  | gastric aspirate positive |  | clarithromycin | 2 weeks | Recovered | 11 |
| 17 | Female | 67 | Bronchiectasis | 0 | 0 | 0 | 0 | 1 | 0 | Bronchiectasis in the right lung and small nodules in the right and left lungs |  | sputum and bronchial washing specimen positive |  | Isoniazid, Rifampin, Ethambutol, and Streptomycin | 1 month | Recovered | 12 |
| 18 | Female | 72 | Pulmonary sequestration | 1 | 0 | 0 | 0 | 0 | 0 | consolidation in the left lower lung |  | sputum and surgical specimen positive |  | The left lower lobectomy was performed | / | Recovered | 13 |
| 19 | Female | 26 | None | 1 | 0 | 0 | 0 | 0 | 1 | hilar lymphadenopathy and nodular densities on the left side |  | transbronchial biopsy |  | Rifampin and Ethambutol | 2 months | Recovered | 14 |
| 20 | Female | 37 | None | 0 | 0 | 0 | 0 | 0 | 0 | nodule in the left upper lobe |  | left upper lobe nodule positive |  | Rifampin, Azithromycin and ciprofloxacin | 12 months | Recovered | 15 |
| 21 | Female | 60 | Bronchiectasis | 0 | 0 | 0 | 0 | 1 | 0 | a cavity, nodular shadows, and bronchiectasis in the left upper lobe and in the left and right middle lobes |  | Gastric juice positive |  | Clarithromycin, levofloxacin, and Rifampin | 17 months | Recovered | 16 |
| 22 | Male | 59 | COPD, degenerative joint disease | 1 | 1 | 0 | 1 | 0 | 0 | dense hypoaerated alveolar opacity in the left upper lobe apicoposterior segment, left hilar and mediastinaladenopathy | Bronchoalveolar lavage fluid positive |  |  | Ertapenem, clindamycin and ambulatory oxygen supplementation | 1 week | Recovered | 17 |
| 23 | Male | 54 | COPD and Rheumatoid arthritis | 1 | 0 | 1 | 1 | 0 | 0 | mediastinal adenopathy in the pretracheal and subcarinal regions, measuring, with concomitant interstitial infiltration and honey-combing of both lung |  | resected caseating granulomatous lymph node tissue and bronchoalveolar lavage positive |  | Rifabutin, Azithromycin, and Ethambutol | 18 months | Recovered | 18 |
| 24 | Female | 57 | Bronchiectasis hypertension | 0 | 0 | 0 | 0 | 0 | 0 | bronchiectasis and a centrinodular shadow in the right middle and lower lobes |  | sputum positive | sputum positive | Rifampin, Clarithromycin and Ethambutol | 24 months | Recovered | 19 |
| 25 | Male | 62 | Abnormal chest shadow | 0 | 0 | 0 | 0 | 1 | 1 | cavitary lesions in both upper lung |  | positive | positive | Rifampin, Clarithromycin and Ethambutol | 36 months | Recovered | 19 |
| 26 | Female | 67 | Bronchiectasis | 0 | 0 | 0 | 0 | 1 | 0 | bronchiectasis in the right middle lobe |  | tissue positive | positive | Isoniazid, Rifampin, Ciprofloxacin and clarithromycin. Right lower lobectomy. | 12 months | Recovered | 19 |
| 27 | Male | 72 | Gastric cancer and COPD | 1 | 0 | 0 | 0 | 0 | 1 | fibrocavitary lesions in the right upper lobe as well as emphysematous changes in both lung fields |  | positive | positive | No treatment | / | Unknown | 19 |
| 28 | Female | 63 | Sinusitis and Bronchiectasis | 1 | 0 | 0 | 0 | 1 | 0 | nodular bronchiectatic lesions in both lung |  | sputum positive | sputum positive | Rifampin, Ethambutol, and Clarithromycin | 12 months | Recovered | 19 |
| 29 | Male | 69 | Lymphoma, diabetes mellitus, and renal insufficiency | 0 | 0 | 1 | 0 | 0 | 0 | lack of structural lung disease |  | sputum positive | sputum positive | Azithromycin, Ethambutol and Doxycycline | 12 months | Recovered | 20 |
| 30 | Male | 34 | Sjogren's syndrome | 1 | 1 | 0 | 0 | 0 | 0 | lack of structural lung disease |  | Pleural effusion positive |  | Moxifloxacin and pus drainage | 1 month | Recovered | 20 |
| 31 | Male | 60 | Leukemia and renal insufficiency | 1 | 1 | 0 | 0 | 0 | 0 | lack of structural lung disease |  | sputum positive | sputum positive | Doxycycline, Levofloxacin, Azithromycin | 8 months | Died | 20 |
| 32 | Female | 46 | Osteosarcoma | 0 | 1 | 0 | 0 | 0 | 0 | lack of structural lung disease |  | sputum positive | sputum positive | Doxycycline, Levofloxacin and Clarithromycin, followed by Azithromycin and Doxycycline | 9 months | Recovered | 20 |

aCOPD, Chronic obstructive pulmonary disease. b “1” represent the symptom was appeared in the patient, and “0” represent the symptom was not appeared in the patient; Symptoms only list the key clinical categories which appeared in more than 5 patients. c Identification methods included the types of sample used for pathogen identification. d “/” indicated the article does not give the exact duration of treatment.

**Reference**

1. Nanda Kumar U, B V. Pulmonary infection caused by Mycobacterium gordonae. *Br J Dis Chest*. 1980;74(2):189-192. doi:10.1016/0007-0971(80)90033-9

2. Chan J, McKitrick JC, RS K. Mycobacterium gordonae in the acquired immunodeficiency syndrome. *Ann Intern Med*. 1984;101(3):400. doi:10.7326/0003-4819-101-3-400_1

3. Clague H, Hopkins CA, Roberts C, Jenkins PA. Pulmonary infection with Mycobacterium gordonae in the presence of bronchial carcinoma. *Tubercle*. 1985;66(1):61-63. doi:10.1016/0041-3879(85)90055-8

4. Douglas JG, Calder MA, Choo-Kang YF, AG L. Mycobacterium gordonae: a new pathogen? *Thorax*. 1986;41(2):152-3. doi:10.1136/thx.41.2.152

5. Guarderas J, Alvarez S, Berk SL. Progressive pulmonary disease caused by Mycobacterium gordonae. *Southern medical journal*. 1986;79(4):505-507. doi:10.1097/00007611-198604000-00029

6. Aguado JM, Gómez-Garcés JL, Manrique A, Soriano F. Pulmonary infection by Mycobacterium gordonae in an immunocompromised patient. *Diagnostic microbiology and infectious disease*. 1987;7(4):261-263. doi:10.1016/0732-8893(87)90141-6

7. de Gracia J, Vidal R, Martin N, Bravo C, Gonzalez T, A R. Pulmonary disease caused by Mycobacterium gordonae. *Tubercle*. 1989;70(2):135-7. doi:10.1016/0041-3879(89)90038-x

8. Barber TW, Craven DE, Farber HW. Mycobacterium gordonae: A Possible Opportunistic Respiratory Tract Pathogen in Patients with Advanced Human Immunodeficiency Virus, Type 1 Infection. *Chest*. 1991;100(3):716-720. doi:10.1378/chest.100.3.716

9. Weinberger M, Berg SL, Feuerstein IM, Pizzo PA, Witebsky FG. Disseminated Infection with Mycobacterium gordonae Report of a Case and Critical Review of the Literature. *Clinical infectious diseases*. 1992;14(6):1229-1239. doi:10.1093/clinids/14.6.1229

10. Nathan V, Mehta JB, Dralle W. Rifabutin in the treatment of cavitary lung disease due to Mycobacterium gordonae. *Southern medical journal*. 1993;86(7):839-841. doi:10.1097/00007611-199307000-00027

11. Resch B, Eber E, Beitzke A, Bauer C, M. Z. Pulmonary infection due to Mycobacterium gordonae in an adolescent immunocompetent patient. *Respiration*. 1997;64(4):300-3. doi:10.1159/000196691

12. Fujita Y, Matsumoto H, Fujikane T, et al. [Pulmonary infection caused by Mycobacterium gordonae in immunocompetent patient]. *Kekkaku*. 2000;75(4):369-74.

13. Umeda Y, Matsuno Y, Imaizumi M, Mori Y, Iwata H, Takiya H. Extralobar pulmonary sequestration infected with Mycobacterium gordonae. *The Journal of Thoracic and Cardiovascular Surgery*. 2009;137(1):e23-e24. doi:10.1016/j.jtcvs.2008.03.040

14. Mazumder SA, Hicks A, J N. Mycobacterium gordonae pulmonary infection in an immunocompetent adult. *N Am J Med Sci*. 2010;2(4):205-7.

15. Asija A, Prasad A, E E. Disseminated Mycobacterium gordonae infection in an immunocompetent host. *Am J Ther*. 2011;18(3):e75-7. doi:10.1097/MJT.0b013e3181e32e55

16. Nakazawa A, Hagiwara E, Ikeda S, Oda T, Komatsu S, Ogura T. [A case of pulmonary Mycobacterium gordonae infection diagnosed by gastric juice culture and successfully treated with multidrug chemotherapy]. *Kekkaku*. 2012;87(11):727-31.

17. Rudra P, Rajesh S, Pritam N. Pulmonary Infection with Mycobacterium Gordonae in an Immunocompetent Patient: A Case Report. *American Journal of Infectious Diseases and Microbiology*. 2013;2(1):1-3. doi:10.12691/ajidm-2-1-1

18. Youssef D, Shams WE, Elshenawy Y, El-Abbassi A, Moorman JP. Pulmonary infection with caseating mediastinal lymphadenitis caused by Mycobacterium gordonae. *International Journal of Mycobacteriology*. 2014;3(3):220-223. doi:10.1016/j.ijmyco.2014.05.001

19. Morimoto K, Kazumi Y, Shiraishi Y, et al. Clinical and microbiological features of definiteMycobacterium gordonaepulmonary disease: the establishment of diagnostic criteria for low-virulence mycobacteria. *Transactions of The Royal Society of Tropical Medicine and Hygiene*. 2015;109(9):589-593. doi:10.1093/trstmh/trv058

20. Chang H-Y, Tsai W-C, Lee T-F, Sheng W-H. Mycobacterium gordonae infection in immunocompromised and immunocompetent hosts: A series of seven cases and literature review. *Journal of the Formosan Medical Association*. 2021;120(1):524-532. doi:10.1016/j.jfma.2020.06.029
